# Supplementary material
Source: Research Square preprint supplement (doi:10.21203/rs.3.rs-10065779/v1)
Supplement: Supplementary file 1 [file 6a551699fa4941b6449cf959.docx]

**APPENDIX 1.** Summary of the studies analysed

**Table.** Representative Studies Included in the Review

| **No** | **Authors** | **Year** | **Title** | **Context** | **Method** | **Main Driver(s)** | **Key Findings** |
| --- | --- | --- | --- | --- | --- | --- | --- |
| 1 | Park | 2026 | From Shock to Resilience: Technology Policy and SME Adaptation under Geopolitical Trade Disruption | SMEs under geopolitical trade disruption | Quantitative | Technology Policy, Adaptation Capability | Policy support strengthens SME adaptation and resilience during geopolitical shocks. |
| 2 | Pusparini et al. | 2026 | Surviving Crisis through Business Innovation Ambidexterity and Resilience | Indonesian MSMEs | Quantitative | Innovation Capability, Ambidexterity | Innovation capability significantly improves MSME resilience. |
| 3 | Paun et al. | 2026 | Financial Resilience in a Dual Crisis | Healthcare SMEs | Quantitative | Financial Resilience | Financial resilience enhances SME survival during multiple crises. |
| 4 | Ahmad et al. | 2026 | Operational Disruption Absorption and Recoverability on SMEs' Performance | SMEs | Quantitative | Government Support, Recovery Capability | Government support moderates the relationship between disruption absorption and performance. |
| 5 | McGrath et al. | 2026 | Resilience Strategies in Entrepreneurial SME Networks | SME Networks | Qualitative | Collaborative Networks | Network embeddedness strengthens resilience strategies. |
| 6 | Conz et al. | 2026 | Navigating Organizational Resilience in SMEs | SMEs | Conceptual | Organizational Resilience | Resilience emerges through cognitive, technological, and value-chain capabilities. |
| 7 | Wu & Chu | 2026 | Digital Transformation and SME Resilience | SMEs | Quantitative | Digital Transformation | Digital transformation improves supply-chain coordination and resilience. |
| 8 | Seow et al. | 2026 | Enhancing Tourism SMEs’ Business Resilience | Tourism SMEs | Quantitative | IT Capability, Supply Chain Collaboration | IT capability directly improves business resilience. |
| 9 | Logožar & Loubser-Strydom | 2026 | Stress-Testing Slovenian SME Resilience | SMEs | Scenario Analysis | Scenario Planning | Stress-testing helps SMEs prepare for external shocks. |
| 10 | Choudhury et al. | 2025 | SME, Crisis and Geopolitical Risk | SMEs | Review | Geopolitical Risk Management | Geopolitical risk management is increasingly critical for SME resilience. |
| 11 | Li et al. | 2025 | Digitalization, ESG Strategies and SME Resilience | SMEs | Quantitative | Digitalization, ESG | Digital and sustainability strategies jointly enhance resilience. |
| 12 | Yang et al. | 2025 | Enhancing Financial Resilience in Manufacturing SMEs | Manufacturing SMEs | Decision Framework | Digital Transformation, Financial Resilience | Digitalization contributes to financial resilience. |
| 13 | Shojaei et al. | 2025 | Supply Chain Resilience Improvement in SMEs | SMEs | Quantitative | Industry 4.0, Supply Chain Resilience | Industry 4.0 technologies improve resilience. |
| 14 | Ford et al. | 2025 | Business Resilience During a Crisis | SMEs | Quantitative | Government Support | Grant funding enhances resilience and recovery. |
| 15 | Mykolenko et al. | 2025 | SMEs’ Resilience and Its Contributing Factors | SMEs | SLR | Multiple Drivers | Resilience is shaped by internal and external factors. |
| No | Authors | Year | Title | Context | Method | Main Driver(s) | Key Findings |
| 16 | Otter & Uschkurat | 2024 | Conceptual Development of a Resilience Maturity Model for SMEs | SMEs | Conceptual | Resilience Capability | Resilience develops progressively through organizational maturity stages. |
| 17 | Okoli et al. | 2025 | Measuring Organizational Resilience in a Resource-Constrained Environment | Micro and Small Service Enterprises | Quantitative | Organizational Resilience | Adaptive capability and resource flexibility significantly strengthen resilience. |
| 18 | Tete et al. | 2024 | Factors Influencing the Resilience of Rural Agricultural and Retail MSMEs | Rural MSMEs | Quantitative | Social Capital, Adaptive Capacity | Community support and adaptive capacity improve resilience outcomes. |
| 19 | Widiastini et al. | 2023 | How Do MSMEs in Bali Survive the Pandemic? | Tourism MSMEs | Qualitative | Organizational Agility | Rapid adaptation and innovation support business continuity. |
| 20 | Widodo | 2021 | Entrepreneurship Characteristics, Innovation, and Marketing Strategy to MSME Resilience | MSMEs | Quantitative | Innovation Capability, Entrepreneurial Orientation | Innovation and entrepreneurial characteristics positively affect resilience. |
| 21 | Shahzad et al. | 2026 | Innovation as a Resilience-Building Strategy in MSMEs | MSMEs | Qualitative | Innovation Capability | Innovation functions as a core resilience mechanism under uncertainty. |
| 22 | Yahya et al. | 2025 | Optimizing Funding and Networks for MSME Success | Indonesian MSMEs | Quantitative | Financial Access, Networks | Funding and networking capabilities jointly improve resilience. |
| 23 | Rizqi & Dhewanto | 2015 | Networking Development among SMEs to Face ASEAN Economic Community | SMEs | Conceptual | Collaborative Networks | Strategic networks enhance competitiveness and adaptability. |
| 24 | Bharathithasan & Srinivasan | 2024 | Unlocking the Keys to Financial Success and Sustainability in Microbusiness | Microbusinesses | Quantitative | Financial Capability | Financial capability contributes to sustainable resilience. |
| 25 | Parkinson et al. | 2023 | Leveraging Artificial Intelligence to Build SMEs’ Resilience | SMEs | Conceptual | Digital Transformation, AI Capability | AI adoption enhances resilience and decision-making capacity. |
| 26 | Gupta et al. | 2025 | QR-Based Micro-Payments and Small Business Resilience | Small Businesses | Quantitative | Digital Payment Adoption | Digital payment systems improve business continuity and resilience. |
| 27 | Syamsari et al. | 2022 | Selecting Priority Policy Strategies for Sustainability of MSMEs | Indonesian MSMEs | Policy Analysis | Government Support | Policy interventions are critical for sustaining MSME resilience. |
| 28 | Astuty et al. | 2024 | Sustainable Resilience Strategy in the Digitalization Era | Microbusinesses | Quantitative | Digital Transformation | Digitalization improves resilience and long-term sustainability. |
| 29 | Shirish et al. | 2023 | Management and Sustenance of Digital Transformations in the Irish Microbusiness Sector | Microbusinesses | Qualitative | Digital Leadership | Leadership is essential for successful digital transformation and resilience. |
| 30 | Dewi et al. | 2026 | Frugal Innovation as a Socially Embedded Capability System | MSMEs | Qualitative | Frugal Innovation, Social Capital | Socially embedded innovation strengthens adaptive capacity and resilience. |
| No | Authors | Year | Title | Context | Method | Main Driver(s) | Key Findings |
| 31 | Dewi et al. | 2026 | Frugal Innovation as a Socially Embedded Capability System | MSMEs | Qualitative | Frugal Innovation, Social Capital | Frugal innovation enhances resilience through resource optimization and social embeddedness. |
| 32 | Bharathithasan & Srinivasan | 2024 | Unlocking the Keys to Financial Success and Sustainability in Microbusiness | Microbusinesses | Quantitative | Financial Capability | Financial management capability contributes to resilience and sustainability. |
| 33 | Parkinson et al. | 2023 | Leveraging Artificial Intelligence (AI) to Build SMEs’ Resilience | SMEs | Conceptual | AI Capability, Digital Transformation | AI supports decision-making and organizational resilience. |
| 34 | Gupta et al. | 2025 | QR-Based Micro-Payments and Small Business Resilience | Small Businesses | Quantitative | Digital Payment Capability | Digital payment adoption strengthens business continuity. |
| 35 | Syamsari et al. | 2022 | Selecting Priority Policy Strategies for Sustainability of MSMEs | Indonesian MSMEs | Policy Analysis | Government Support | Policy interventions improve MSME sustainability and resilience. |
| 36 | Astuty et al. | 2024 | Sustainable Resilience Strategy: Unleashing Microbusiness Potential in the Digitalization Era | Microbusinesses | Quantitative | Digital Transformation | Digitalization improves adaptive capacity and resilience. |
| 37 | Shirish et al. | 2023 | Management and Sustenance of Digital Transformations in the Irish Microbusiness Sector | Microbusinesses | Qualitative | Digital Leadership | Leadership capability is essential for successful digital transformation. |
| 38 | Otoo | 2026 | Organizational Learning Capability and Individual Ambidexterity | SMEs | Quantitative | Organizational Learning | Learning capability strengthens adaptive behavior and resilience. |
| 39 | Charisma et al. | 2025 | Building Business Resilience Through Strategic Entrepreneurship | Culinary MSMEs | Quantitative | Strategic Entrepreneurship | Entrepreneurial capability significantly enhances resilience. |
| 40 | Salam et al. | 2026 | Antecedents of Business Resilience in Hospitality Industry | Hospitality SMEs | Quantitative | Innovation Capability, Organizational Learning | Learning and innovation capabilities are key antecedents of resilience. |
| 41 | Fernandes et al. | 2026 | Knowledge Spillovers and Organizational Resilience | Service MSMEs | Quantitative | Knowledge Management, Digital Capability | Digital capability amplifies the positive effect of knowledge spillovers on resilience. |
| 42 | Choong et al. | 2023 | Adaptability, Government Support and SME Business Resilience | SMEs | Quantitative | IT Capability, Government Support | Government support and IT capability jointly improve resilience. |
| 43 | Handayani et al. | 2025 | The Role of MSME Association Networks in Business Resilience | MSMEs | Quantitative | Association Networks | Participation in networks improves resilience outcomes. |
| 44 | Pusparini et al. | 2026 | Surviving Crisis Through Business Innovation Ambidexterity and Resilience | Indonesian MSMEs | Quantitative | Innovation Ambidexterity | Balancing exploration and exploitation enhances resilience. |
| 45 | Prasad & Roy | 2026 | Unveiling the Factors of Family Business Resilience | Family SMEs | Exploratory Analysis | Family Capital, Organizational Resilience | Family resources and trust strengthen resilience capability. |
| No | Authors | Year | Title | Context | Method | Main Driver(s) | Key Findings |
| 46 | Sitinjak et al. | 2022 | Organizational Ambidexterity and Public Policy Support as Determinants of Business Resilience | Indonesian SMEs | Quantitative | Ambidexterity, Government Support | Organizational ambidexterity and policy support significantly improve resilience. |
| 47 | Gupta & Kumar Singh | 2023 | Managing Resilience of MSMEs During COVID-19: Analysis of Barriers | MSMEs | Quantitative | Barrier Management | Liquidity constraints and operational inefficiencies weaken resilience. |
| 48 | Hidayat et al. | 2025 | Synergising Competitiveness and Technological Innovation to Enhance MSME Resilience Through Entrepreneurial Orientation | MSMEs | Quantitative | Entrepreneurial Orientation, Innovation | Entrepreneurial orientation transforms innovation into resilience outcomes. |
| 49 | Adam et al. | 2024 | Entrepreneurial Orientation in Indonesian SMEs | Indonesian SMEs | Quantitative | Entrepreneurial Orientation | Entrepreneurial orientation positively affects adaptability and business performance. |
| 50 | Gaffar et al. | 2022 | Has the COVID-19 Pandemic Accelerated the Digital Transformation of MSMEs in Indonesia? | MSMEs | Quantitative | Digital Transformation | Crisis accelerates digital transformation and resilience building. |
| 51 | Kurniawati et al. | 2022 | Change or Destroy: The Digital Transformation of Indonesian MSMEs | MSMEs | Quantitative | Digital Transformation | Digital transformation becomes essential for long-term survival. |
| 52 | Rachim et al. | 2025 | Transformation of Rice Agribusiness: Exploring New Media Use | Agribusiness MSMEs | Qualitative | Digital Communication | New media supports adaptation and market access. |
| 53 | Irmayani et al. | 2022 | Utilization of ICT in Maintaining Social Resilience in Rural Indonesia | Rural Enterprises | Quantitative | ICT Adoption | ICT strengthens resilience in resource-constrained environments. |
| 54 | Shaliza et al. | 2025 | Strengthening Group Leadership Through ICT Optimization | Rural MSMEs | Quantitative | Leadership, ICT Capability | ICT capability and leadership improve resilience. |
| 55 | Woldesenbet Beta & Gezahegn | 2025 | Entrepreneurial Leadership and MSME Performance in Resource-Constrained Contexts | MSMEs | Quantitative | Entrepreneurial Leadership | Entrepreneurial leadership enhances adaptability and resilience. |
| 56 | Arfara & Karasavvoglou | 2026 | Startup Adaptability and Resilience as Drivers of Entrepreneurial Orientation | Startups | Quantitative | Adaptability | Adaptability strengthens entrepreneurial orientation and resilience. |
| 57 | Gottschalck et al. | 2024 | Cross-Level Effects of Entrepreneurial Orientation and Ambidexterity on Resilience | Small Businesses | Quantitative | Entrepreneurial Orientation, Ambidexterity | Entrepreneurial orientation and ambidexterity jointly enhance resilience. |
| 58 | Kusumasari & Retnandari | 2021 | When Pandemic Knocks, Adapt Fast: Strategy and Resilience of MSMEs Facing Crisis | Indonesian MSMEs | Qualitative | Strategic Agility | Rapid adaptation supports resilience during crises. |
| 59 | Yunus et al. | 2025 | Post-Crisis Growth: Resource Orchestration, Innovation, and Diversification in MSMEs | MSMEs | Quantitative | Resource Orchestration | Strategic orchestration of resources improves post-crisis resilience and growth. |
| 60 | Sakijege | 2024 | Disaster Recovery and Business Continuity: A Case of MSMEs in Dar es Salaam | MSMEs | Case Study | Recovery Capability | Recovery planning and continuity management enhance resilience. |
| No | Authors | Year | Title | Context | Method | Main Driver(s) | Key Findings |
| 61 | Nhamo et al. | 2024 | Building Sustainable SME Ecosystems in Developing Economies | SMEs | Qualitative | Entrepreneurial Ecosystem | Ecosystem support enhances resilience and long-term sustainability. |
| 62 | Kim & Lee | 2025 | Competitive Advantage through Resilience-Oriented Innovation | SMEs | Quantitative | Innovation Capability | Innovation capability contributes directly to competitive advantage. |
| 63 | You et al. | 2023 | Dynamic Capabilities and SME Resilience in Turbulent Environments | SMEs | Quantitative | Dynamic Capabilities | Dynamic capabilities improve adaptability under uncertainty. |
| 64 | Ode et al. | 2026 | SME Resilience and Strategic Adaptation in Emerging Markets | SMEs | Mixed Methods | Strategic Adaptation | Strategic adaptation strengthens organizational resilience. |
| 65 | Bahmanova & Lace | 2026 | Collaboration Networks and SME Resilience under External Disruptions | SMEs | Quantitative | Collaborative Networks | Network collaboration enhances resilience performance. |
| 66 | Kattan-Rodríguez & Galindo-Manrique | 2025 | Digital Financial Inclusion and Sustainable MSME Growth | MSMEs | Quantitative | Financial Inclusion | Financial inclusion improves resilience and sustainable growth. |
| 67 | Abu Hatab & Lagerkvist | 2024 | Agri-Food SMEs under Geopolitical and Supply Chain Disruptions | Agri-food SMEs | Case Study | Supply Chain Resilience | Supply chain diversification improves resilience. |
| 68 | Li et al. | 2025 | Digitalization, ESG Strategies and SME Sustainability | SMEs | Quantitative | ESG Strategy, Digitalization | ESG and digitalization strengthen sustainable resilience. |
| 69 | Do et al. | 2022 | Resource-Based View and SME Resilience during Crisis | SMEs | Quantitative | Strategic Resources | Valuable resources support resilience capability. |
| 70 | Hlortu et al. | 2026 | Organizational Agility and SME Survival in Crisis Contexts | SMEs | Quantitative | Organizational Agility | Agility significantly improves crisis survival. |
| 71 | Subrahmanyam | 2026 | Knowledge Management and Frugal Innovation in Resource-Constrained SMEs | SMEs | Conceptual | Knowledge Management | Knowledge utilization enhances adaptive capability. |
| 72 | Hudáková et al. | 2023 | Financial Performance and Resilience of SMEs under Economic Uncertainty | SMEs | Quantitative | Financial Resilience | Financial resilience contributes to performance stability. |
| 73 | Sagala & Őri | 2026 | Digital Transformation as a Driver of SME Competitiveness and Resilience | SMEs | Quantitative | Digital Transformation | Digitalization improves competitiveness and resilience. |
| 74 | Priyono et al. | 2020 | Digital Transformation and Business Survival among SMEs | SMEs | Mixed Methods | Digital Transformation | Digital transformation supports long-term survival. |
| 75 | Malik & Terzidis | 2026 | Organizational Resilience and Recovery Strategies for SMEs | SMEs | Qualitative | Recovery Capability | Recovery planning accelerates post-crisis stabilization. |
| 76 | Alzate Rendón & Boada | 2024 | Collaborative Networks as a Strategic Resource for SME Resilience | SMEs | Quantitative | Collaborative Networks | Strong networks facilitate adaptation and learning. |
| 77 | Choong et al. | 2023 | Government Support, IT Capability and Business Resilience | SMEs | Quantitative | Government Support | Government interventions strengthen resilience outcomes. |
| 78 | Mykolenko et al. | 2025 | Determinants of SME Resilience: A Systematic Literature Review | SMEs | SLR | Organizational Resilience | Resilience is shaped by multiple interacting drivers. |
| 79 | Conz & Magnani | 2020 | A Dynamic Perspective on Organizational Resilience | SMEs and Organizations | Conceptual | Organizational Resilience | Resilience is a dynamic process involving adaptation and transformation. |
